# Supplementary material for: Length-dependent translation initiation benefits the functional proteome of human cells
Source: Royal Society of Chemistry journal article supplement (doi:10.1039/c4mb00462k), 2014-10-08
Supplement: c4mb00462k1.pdf [file c4mb00462k1.pdf]

## Length-dependent translation initiation benefits the functional proteome of human cells

Jieming Guo, Xinlei Lian, Jiayong Zhong, Tong Wang, Gong Zhang

### Supplementary Materials

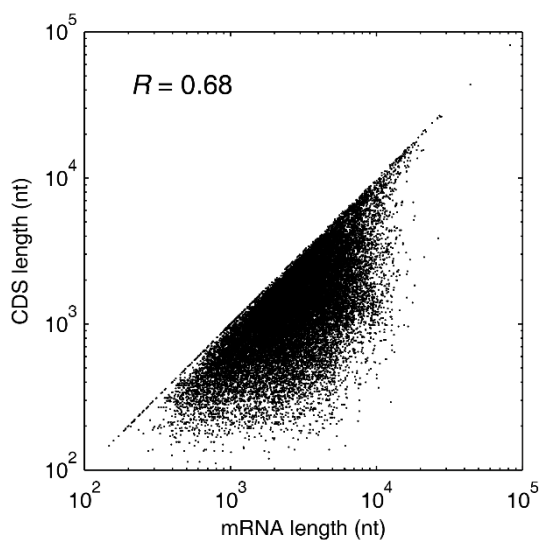

**Figure S1:** Correlation of the mRNA length and CDS length in human hg19 RefSeq-RNA database (downloaded from UCSC Genome Browser on 1.21.2013). Spearman  $R=0.68$ ,  $P < 10^{-16}$ .

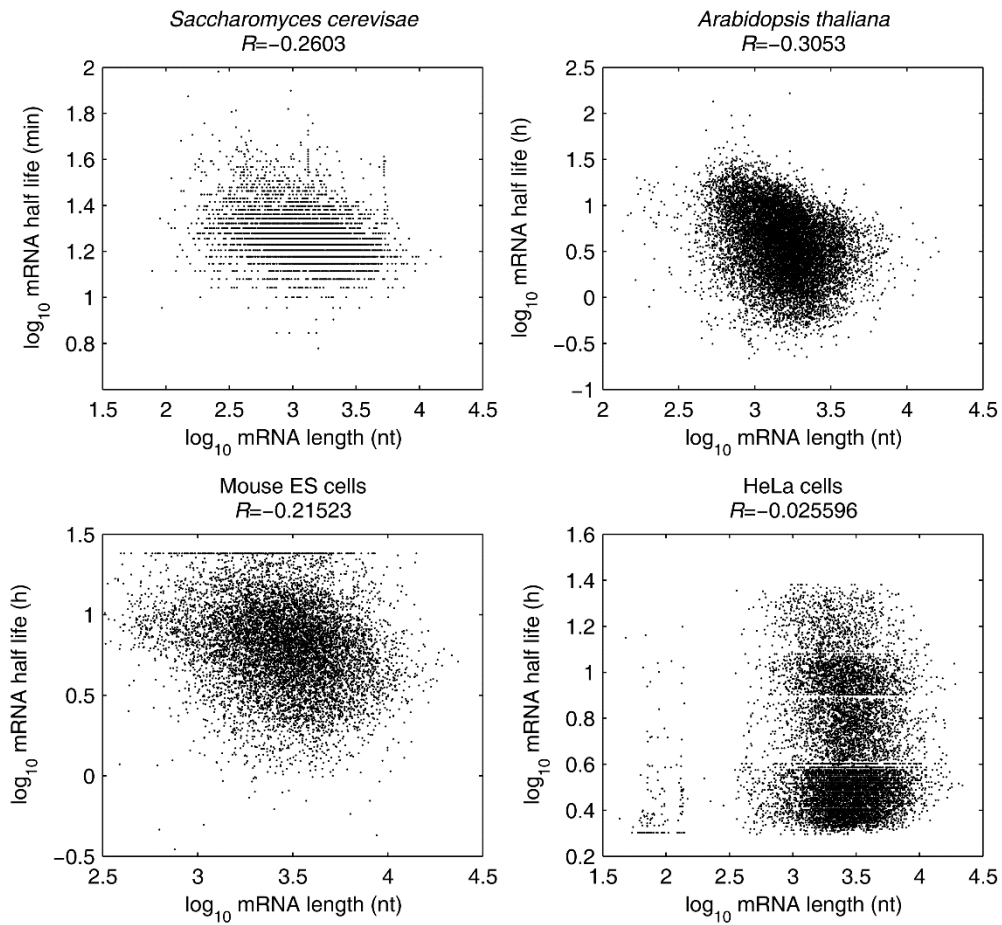

**Figure S2:** mRNA half life is minimally correlated with mRNA length in *Saccharomyces cerevisiae*, *Arabidopsis thaliana*, mouse embryonic stem cells and human HeLa cells. Data were obtained from literatures (Munchel et al., 2011; Narsai et al., 2007; Sharova et al., 2009; Tani et al., 2012).

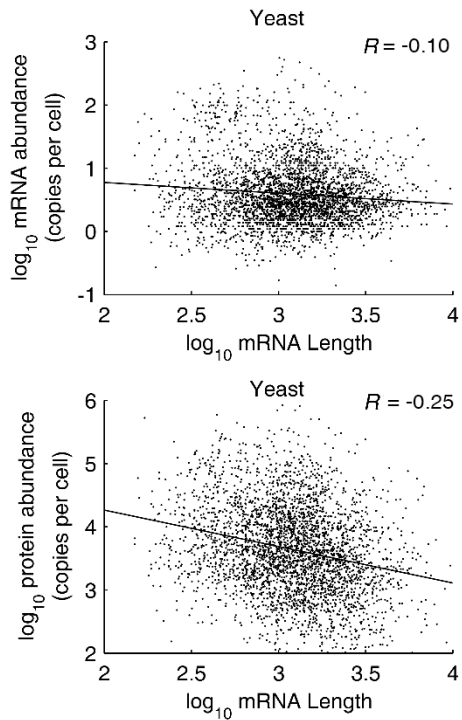

**Figure S3:** The mRNA abundance and protein abundance versus mRNA length in fission yeast. Data were obtained from literature (Marguerat et al., 2012).

## References

- Marguerat, S., Schmidt, A., Codlin, S., Chen, W., Aebersold, R., and Bahler, J., 2012. Quantitative Analysis of Fission Yeast Transcriptomes and Proteomes in Proliferating and Quiescent Cells. *Cell* 151, 671-683.
- Munchel, S.E., Shultzaberger, R.K., Takizawa, N., and Weis, K., 2011. Dynamic profiling of mRNA turnover reveals gene-specific and system-wide regulation of mRNA decay. *Mol Biol Cell* 22, 2787-95.
- Narsai, R., Howell, K.A., Millar, A.H., O'Toole, N., Small, I., and Whelan, J., 2007. Genome-wide analysis of mRNA decay rates and their determinants in *Arabidopsis thaliana*. *Plant Cell* 19, 3418-36.
- Sharova, L.V., Sharov, A.A., Nedorezov, T., Piao, Y., Shaik, N., and Ko, M.S., 2009. Database for mRNA half-life of 19 977 genes obtained by DNA microarray analysis of pluripotent and differentiating mouse embryonic stem cells. *DNA Res* 16, 45-58.
- Tani, H., Mizutani, R., Salam, K.A., Tano, K., Ijiri, K., Wakamatsu, A., Isogai, T., Suzuki, Y., and Akimitsu, N., 2012. Genome-wide determination of RNA stability reveals hundreds of short-lived noncoding transcripts in mammals. *Genome Res* 22, 947-56.
